# Supplementary material for: Monitoring the Spring Flood in Lena Delta with Hydrodynamic Modeling Based on SAR Satellite Products
Source: MDPI journal article supplement (doi:10.3390/rs13224695), 2021-11-20
Supplement: s1 [file s1]

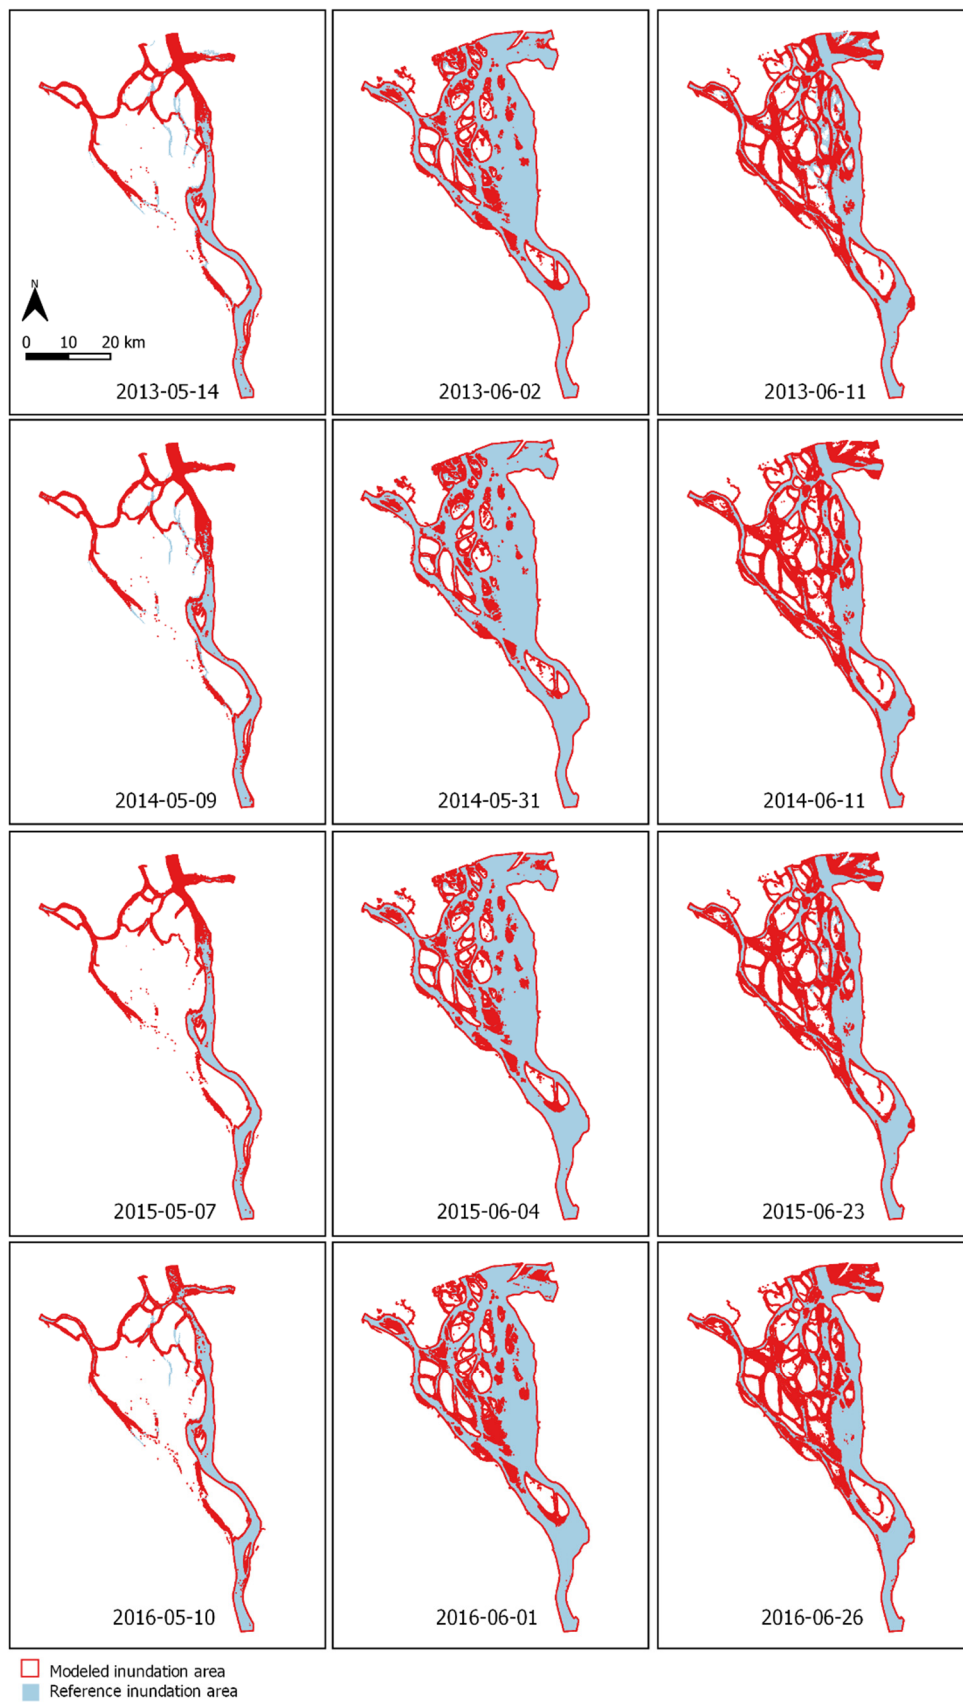

**Figure S1.** The reference and modeled inundation area of the 2013, 2014, 2015, and 2016 flood events

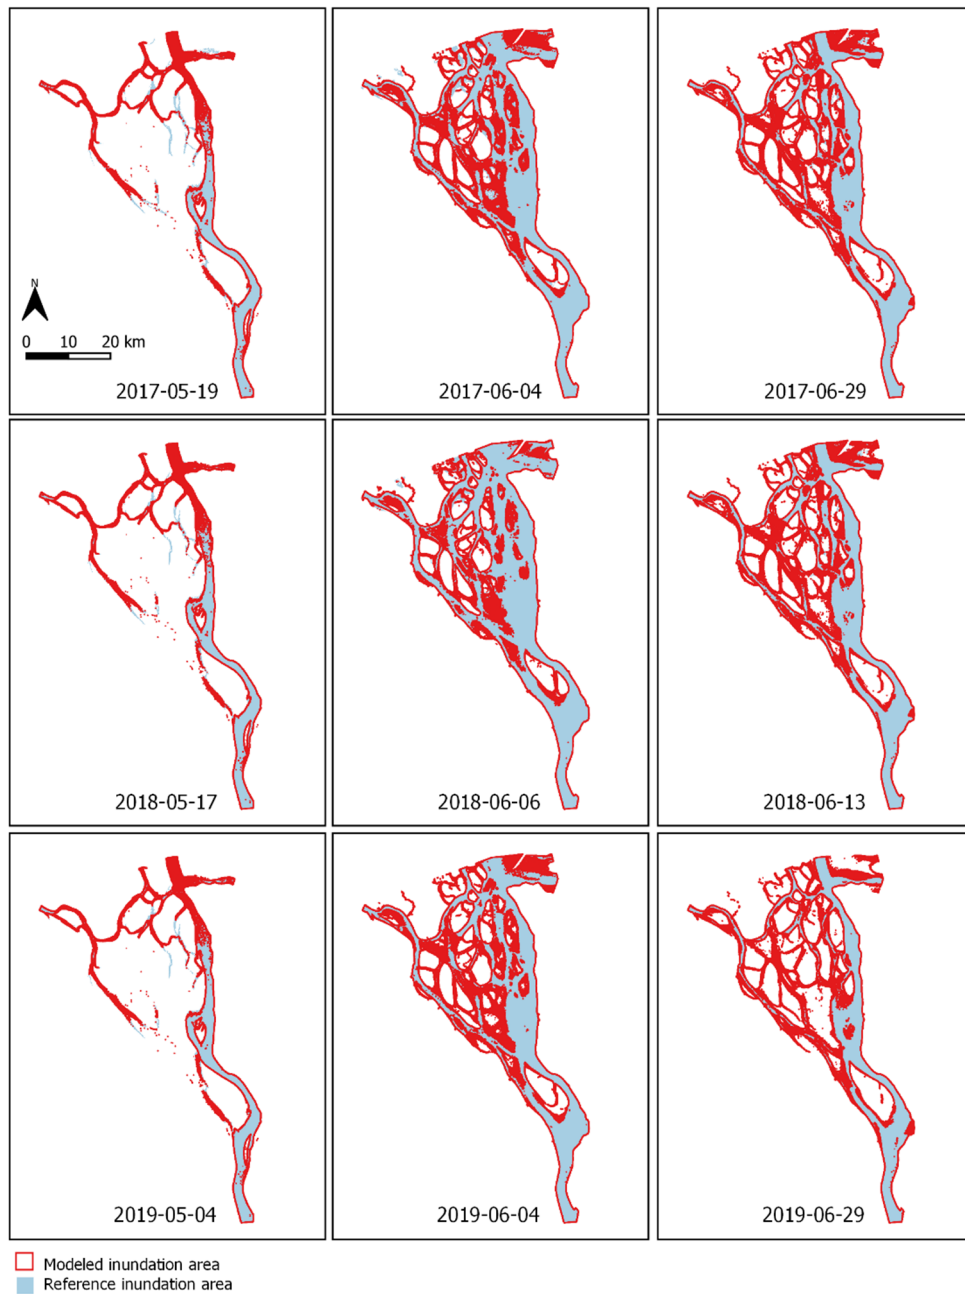

**Figure S2.** The reference and modeled inundation area of the 2017, 2018, and 2019 flood events

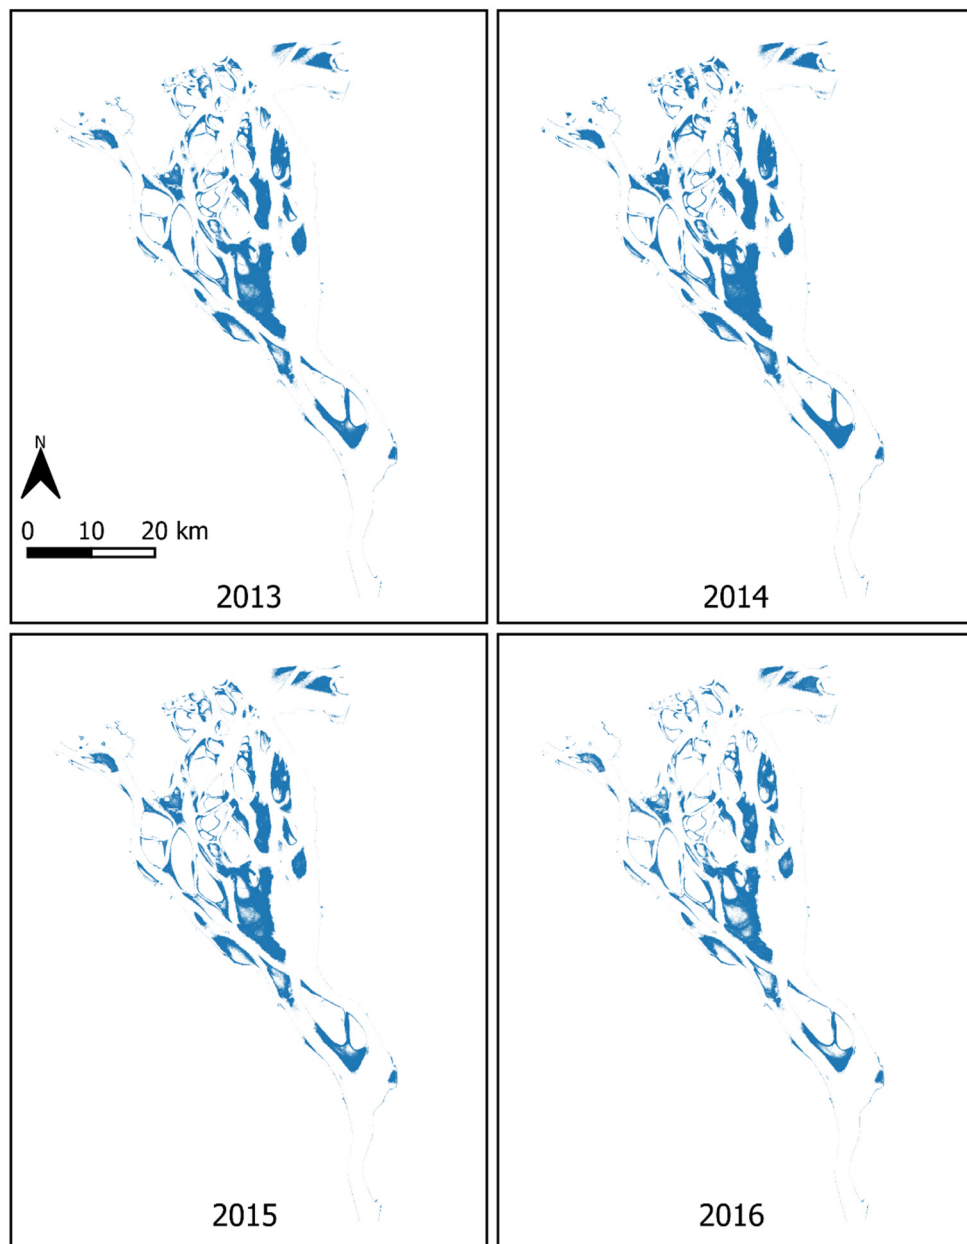

**Figure S3.** The modeled inundation area on the Lena delta floodplain (sans the main channel) of the 2013, 2014, 2015, and 2016 flood events

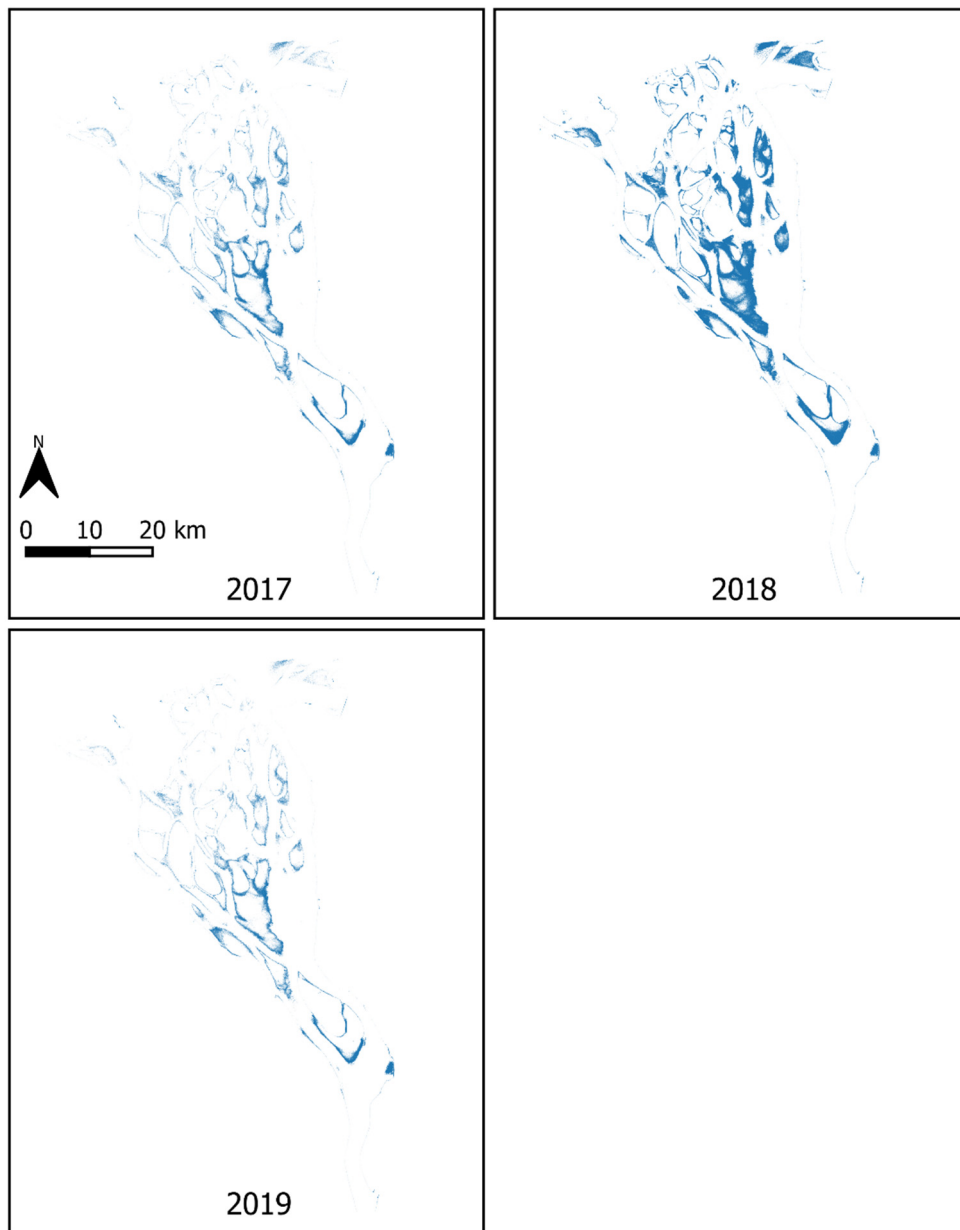

**Figure S4.** The modeled inundation area on the Lena delta floodplain (sans the main channel) of the 2017, 2018, and 2019 flood events

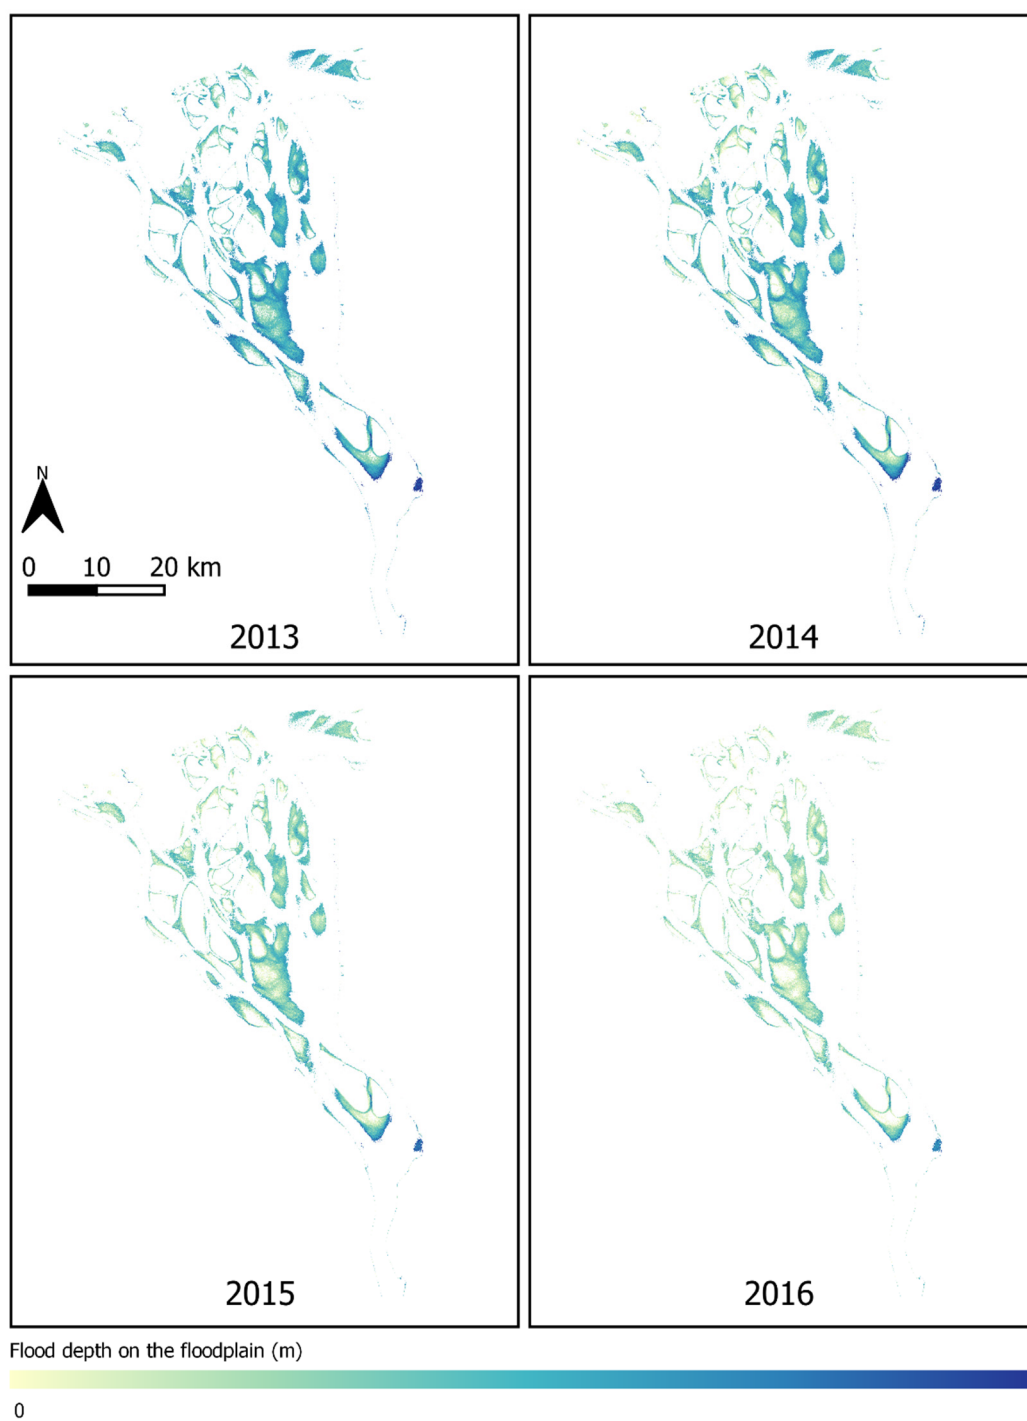

**Figure S5.** The inundation area and flood depth on the Lena delta floodplain (sans the main channel) of the 2013, 2014, 2015, and 2016 flood events

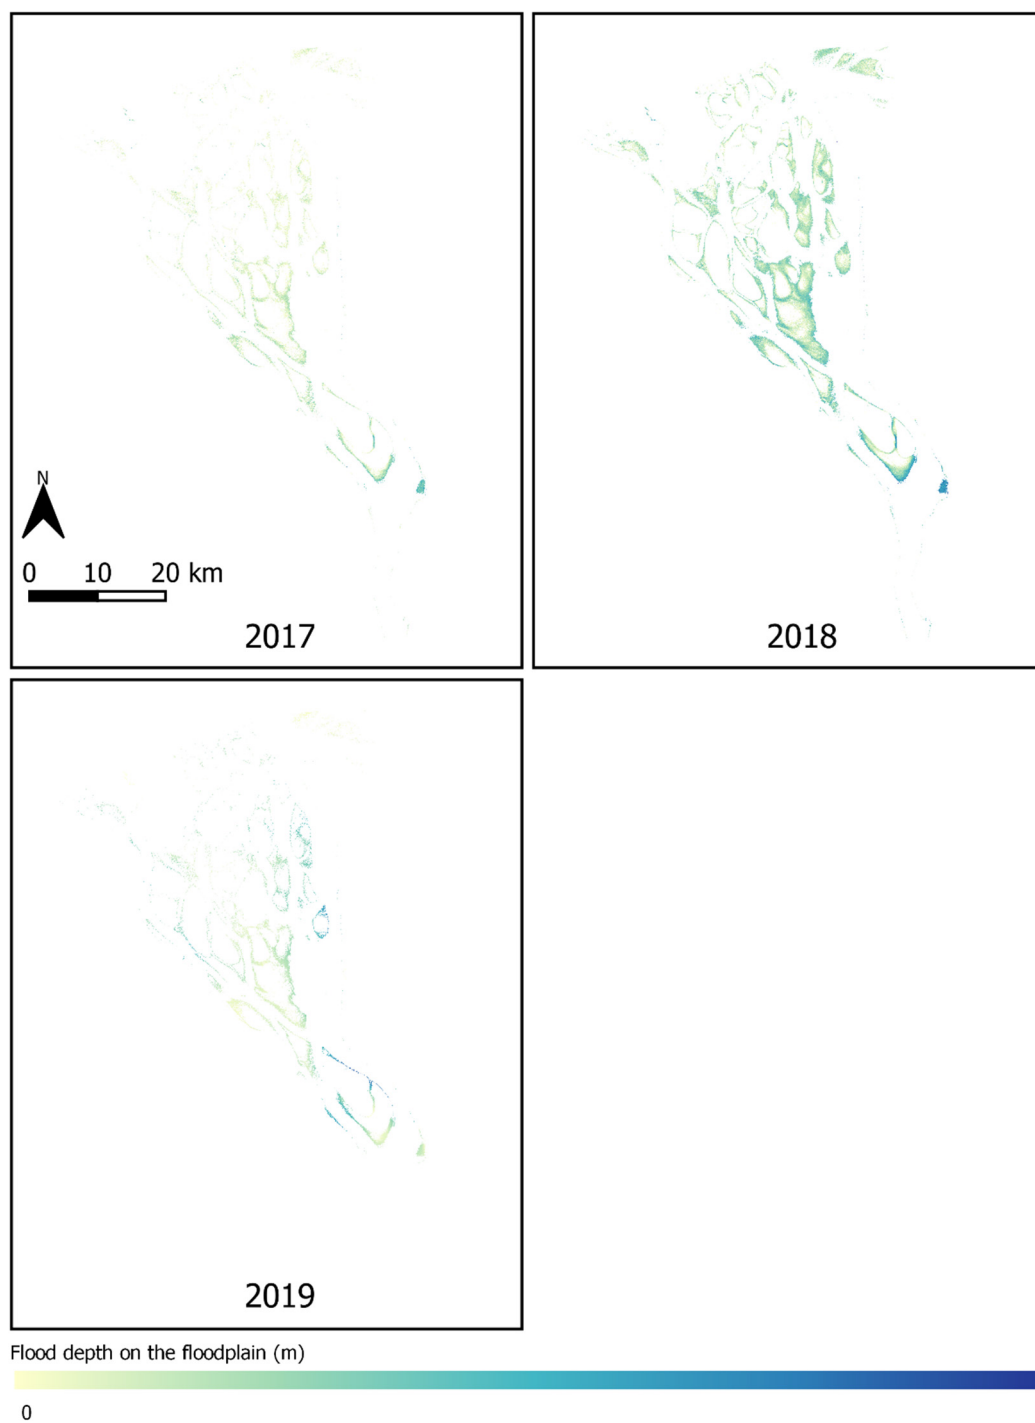

**Figure S6.** The inundation area and flood depth on the Lena delta floodplain (sans the main channel) of the 2017, 2018, and 2019 flood events

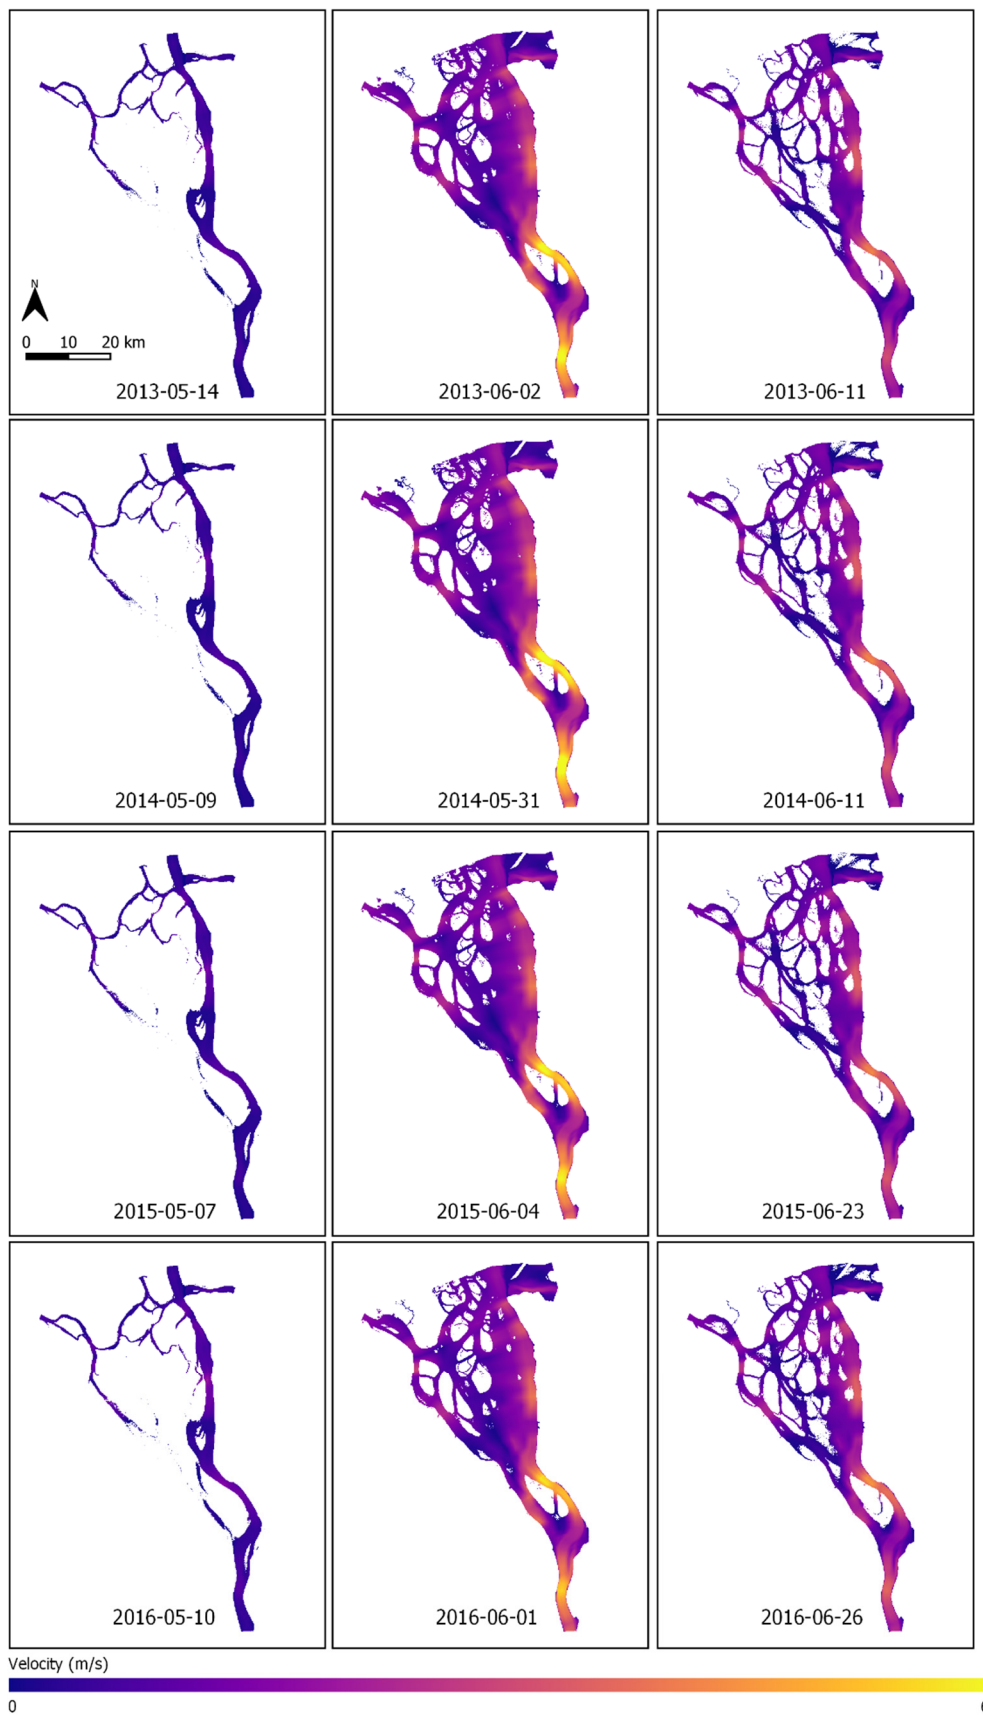

**Figure S7.** The inundation area and flow velocity of the 2013, 2014, 2015, and 2016 flood events

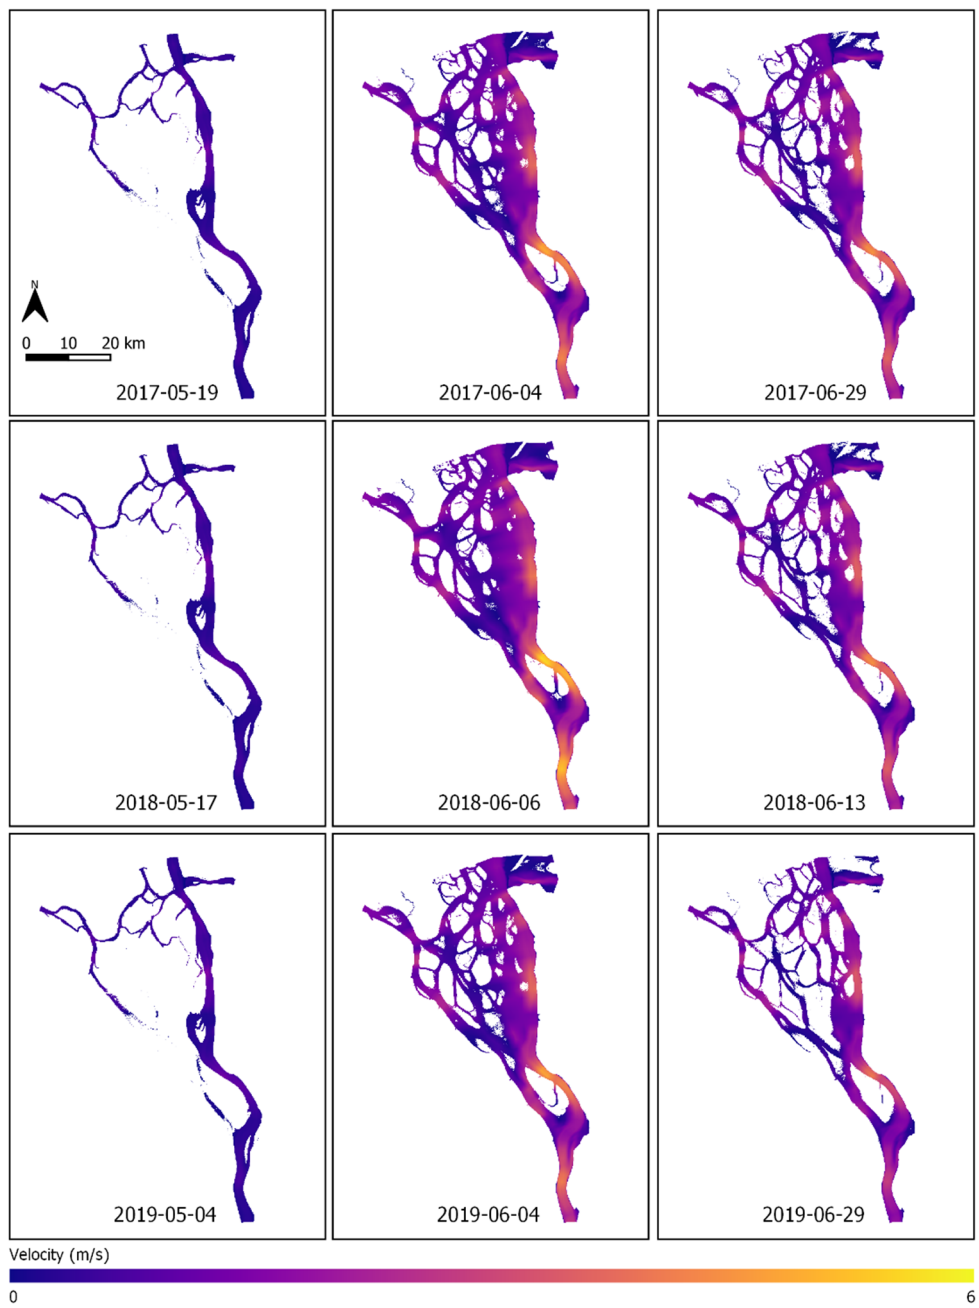

**Figure S8.** The inundation area and flow velocity of the 2017, 2018, and 2019 flood events



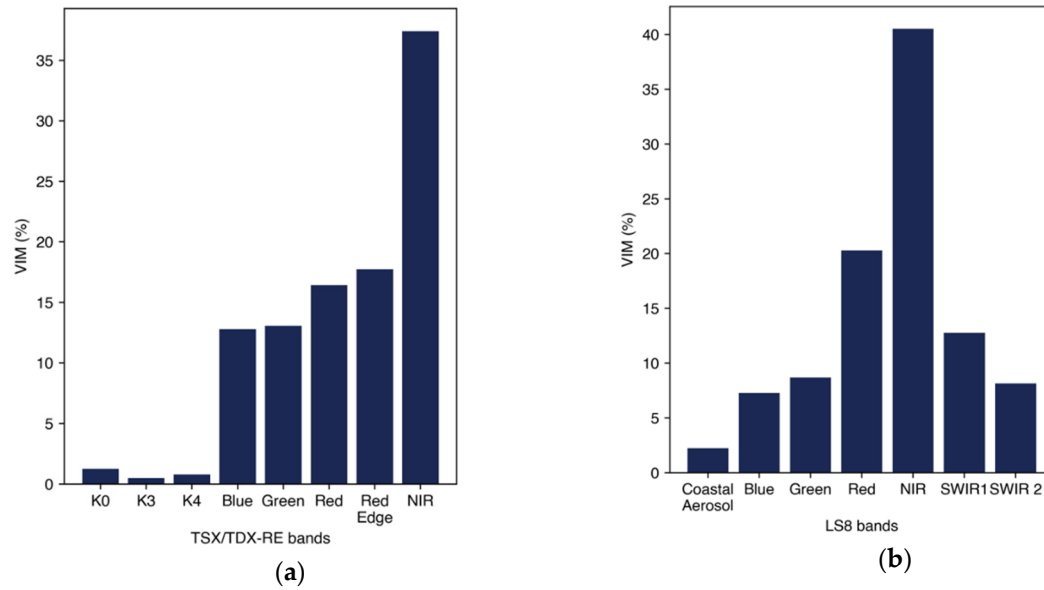

**Figure S9.** The Variable Importance Measures (VIM) of **(a)** the TSX/TDX-RE composite bands and **(b)** LS8 bands for the Random Forest-based land cover classification

**Table S1.** Flow data input

|      | <b>Date</b><br><b>(YYYY-MM-DD)</b> | <b>Lena upstream</b><br><b>discharge (m<sup>3</sup>/s)</b> | <b>Lena</b><br><b>downstream</b><br><b>discharge (m<sup>3</sup>/s)</b> | <b>Khabarova</b><br><b>downstream</b><br><b>discharge (m<sup>3</sup>/s)</b> |
|------|------------------------------------|------------------------------------------------------------|------------------------------------------------------------------------|-----------------------------------------------------------------------------|
| 2013 | 2013-05-14                         | 3,020                                                      | 1,980                                                                  | 1,040                                                                       |
|      | 2013-06-02                         | 155,000                                                    | 101,632                                                                | 53,368                                                                      |
|      | 2013-06-11                         | 56,000                                                     | 36,719                                                                 | 19,281                                                                      |
| 2014 | 2014-05-09                         | 2,280                                                      | 1,495                                                                  | 785                                                                         |
|      | 2014-05-31                         | 173,000                                                    | 113,434                                                                | 59,566                                                                      |
|      | 2014-06-11                         | 62,400                                                     | 40,915                                                                 | 21,485                                                                      |
| 2015 | 2015-05-07                         | 2,989                                                      | 1,960                                                                  | 1,029                                                                       |
|      | 2015-06-04                         | 147,029                                                    | 96,405                                                                 | 50,624                                                                      |
|      | 2015-06-23                         | 62,000                                                     | 40,653                                                                 | 21,347                                                                      |
| 2016 | 2016-05-10                         | 5,366                                                      | 3,518                                                                  | 1,848                                                                       |
|      | 2016-06-01                         | 128,593                                                    | 84,317                                                                 | 44,276                                                                      |
|      | 2016-06-26                         | 70,900                                                     | 46,488                                                                 | 24,412                                                                      |
| 2017 | 2017-05-19                         | 2,720                                                      | 1,783                                                                  | 937                                                                         |
|      | 2017-06-04                         | 87,120                                                     | 57,124                                                                 | 29,996                                                                      |
|      | 2017-06-29                         | 67,980                                                     | 44,574                                                                 | 23,406                                                                      |
| 2018 | 2018-05-17                         | 2,810                                                      | 1,842                                                                  | 968                                                                         |
|      | 2018-06-06                         | 119,200                                                    | 78,158                                                                 | 41,042                                                                      |
|      | 2018-06-13                         | 65,870                                                     | 43,190                                                                 | 22,680                                                                      |
| 2019 | 2019-05-04                         | 3,420                                                      | 2,242                                                                  | 1,178                                                                       |
|      | 2019-06-04                         | 83,000                                                     | 54,422                                                                 | 28,578                                                                      |
|      | 2019-06-29                         | 46,200                                                     | 30,293                                                                 | 15,907                                                                      |

**Table S2.** The inundation areas

| Flood event |                  | Inundation area (km <sup>2</sup> ) |
|-------------|------------------|------------------------------------|
| 2013        | Before the flood | 312.67                             |
|             | The flood peak   | 1095.09                            |
|             | After the flood  | 679.80                             |
| 2014        | Before the flood | 300.71                             |
|             | The flood peak   | 1118.71                            |
|             | After the flood  | 726.73                             |
| 2015        | Before the flood | 312.20                             |
|             | The flood peak   | 1082.70                            |
|             | After the flood  | 723.87                             |
| 2016        | Before the flood | 333.86                             |
|             | The flood peak   | 1047.41                            |
|             | After the flood  | 785.40                             |
| 2017        | Before the flood | 308.20                             |
|             | The flood peak   | 891.70                             |
|             | After the flood  | 765.69                             |
| 2018        | Before the flood | 309.54                             |
|             | The flood peak   | 1023.82                            |
|             | After the flood  | 751.21                             |
| 2019        | Before the flood | 317.93                             |
|             | The flood peak   | 866.80                             |
|             | After the flood  | 604.94                             |

**Table S3.** The range of depth during the annual flood peaks on the floodplains

| Flood event | Flood depth (m) |      |
|-------------|-----------------|------|
|             | Min             | Max  |
| 2013        | 0               | 4.46 |
| 2014        | 0               | 5.12 |
| 2015        | 0               | 4.17 |
| 2016        | 0               | 3.49 |
| 2017        | 0               | 2.12 |
| 2018        | 0               | 3.14 |
| 2019        | 0               | 1.89 |

**Table S4.** The range of flow velocity

| Flood event |                  | Velocity (m/s) |      |      |
|-------------|------------------|----------------|------|------|
|             |                  | Min            | Max  | Mean |
| 2013        | Before the flood | 0              | 1.49 | 0.46 |
|             | The flood peak   | 0              | 5.66 | 1.61 |
|             | After the flood  | 0              | 3.85 | 1.31 |
| 2014        | Before the flood | 0              | 1.34 | 0.41 |
|             | The flood peak   | 0              | 6.13 | 1.67 |
|             | After the flood  | 0              | 3.96 | 1.34 |
| 2015        | Before the flood | 0              | 1.49 | 0.47 |
|             | The flood peak   | 0              | 5.51 | 1.58 |
|             | After the flood  | 0              | 3.95 | 1.33 |
| 2016        | Before the flood | 0              | 1.90 | 0.59 |
|             | The flood peak   | 0              | 5.16 | 1.52 |
|             | After the flood  | 0              | 4.12 | 1.36 |
| 2017        | Before the flood | 0              | 1.43 | 0.44 |
|             | The flood peak   | 0              | 4.38 | 1.39 |
|             | After the flood  | 0              | 4.08 | 1.35 |
| 2018        | Before the flood | 0              | 1.45 | 0.45 |
|             | The flood peak   | 0              | 4.97 | 1.49 |
|             | After the flood  | 0              | 4.03 | 1.35 |
| 2019        | Before the flood | 0              | 1.57 | 0.49 |
|             | The flood peak   | 0              | 4.31 | 1.38 |
|             | After the flood  | 0              | 3.67 | 1.27 |

**Table S5.** Kappa coefficients of all study cases

| Flood event | Discharge | Kappa coefficient |
|-------------|-----------|-------------------|
| 2013        | Low       | 0.79              |
|             | High      | 0.94              |
|             | Medium    | 0.76              |
| 2014        | Low       | 0.80              |
|             | High      | 0.94              |
|             | Medium    | 0.91              |
| 2015        | Low       | 0.95              |
|             | High      | 0.94              |
|             | Medium    | 0.82              |
| 2016        | Low       | 0.86              |
|             | High      | 0.97              |
|             | Medium    | 0.87              |
| 2017        | Low       | 0.78              |
|             | High      | 0.83              |
|             | Medium    | 0.86              |
| 2018        | Low       | 0.81              |
|             | High      | 0.91              |
|             | Medium    | 0.87              |
| 2019        | Low       | 0.83              |
|             | High      | 0.86              |
|             | Medium    | 0.88              |
